# Supplementary material for: DNA Methylation Analysis of Growth Differences between Upright and Inverted Cuttings of Populus yunnanensis
Source: MDPI journal article supplement (doi:10.3390/ijms25105096), 2024-05-07
Supplement: s1 [file s1]

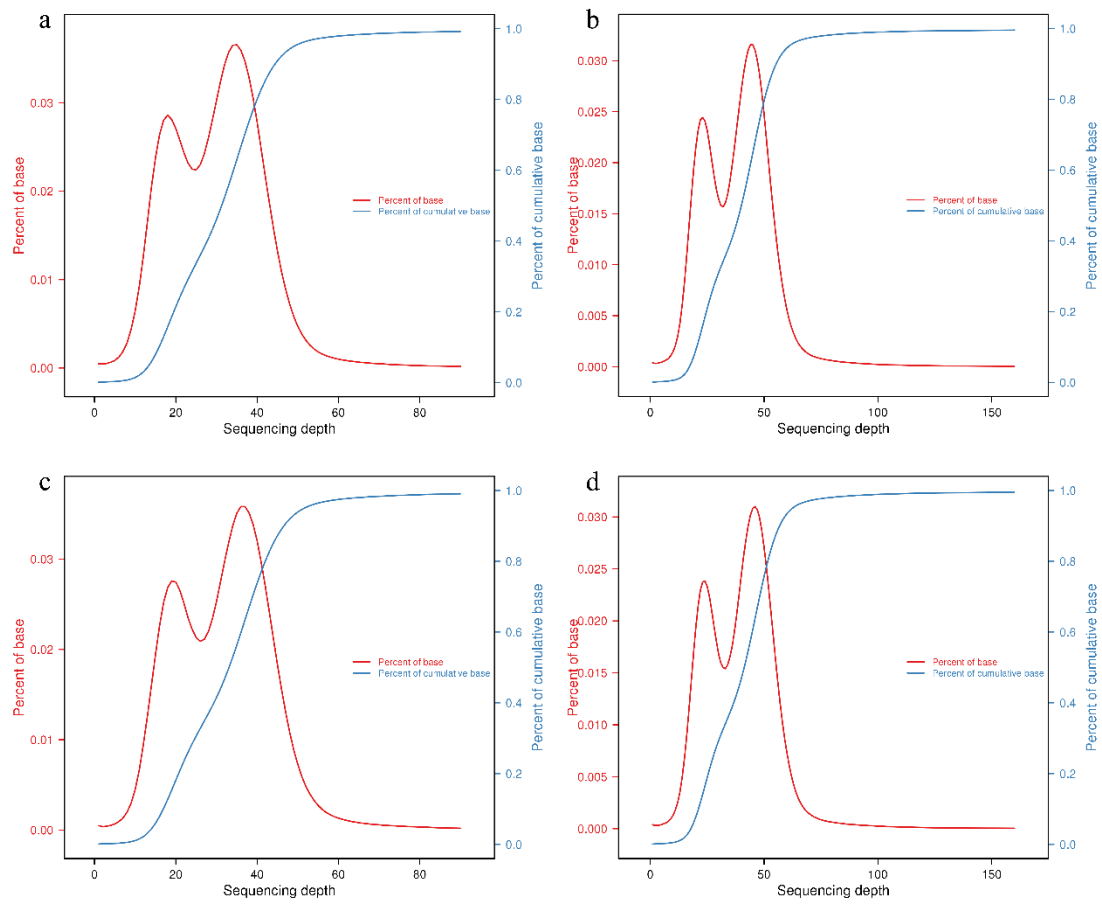

**Figure S1.** Sample sequencing depth distribution. a: JD; b: JZ; c: SD; d: SZ.

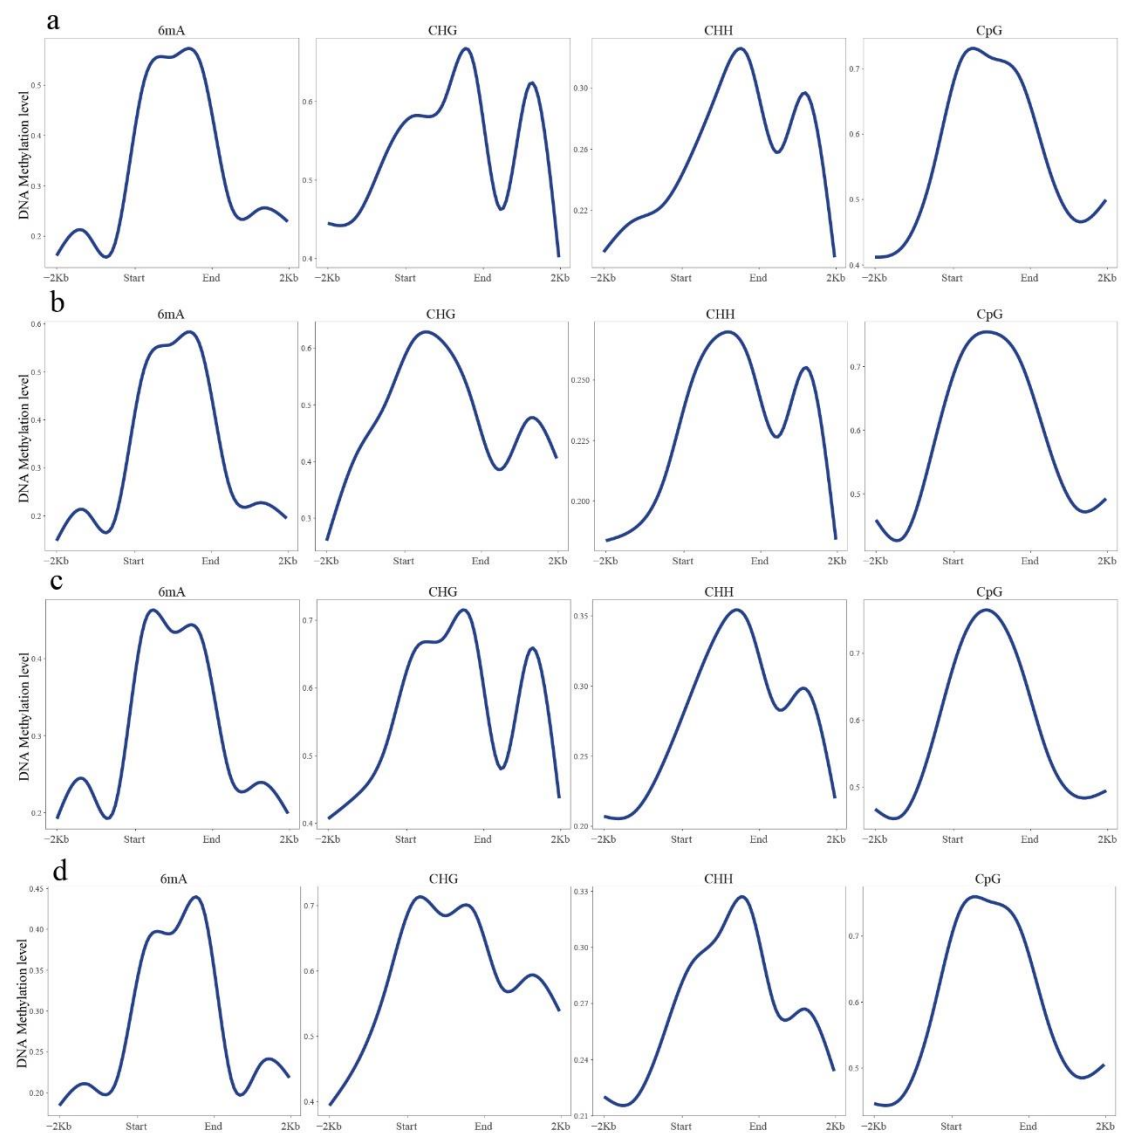

**Figure S2.** Repeat region methylation levels for each sample. a: JD; b: JZ; c: SD; d: SZ.

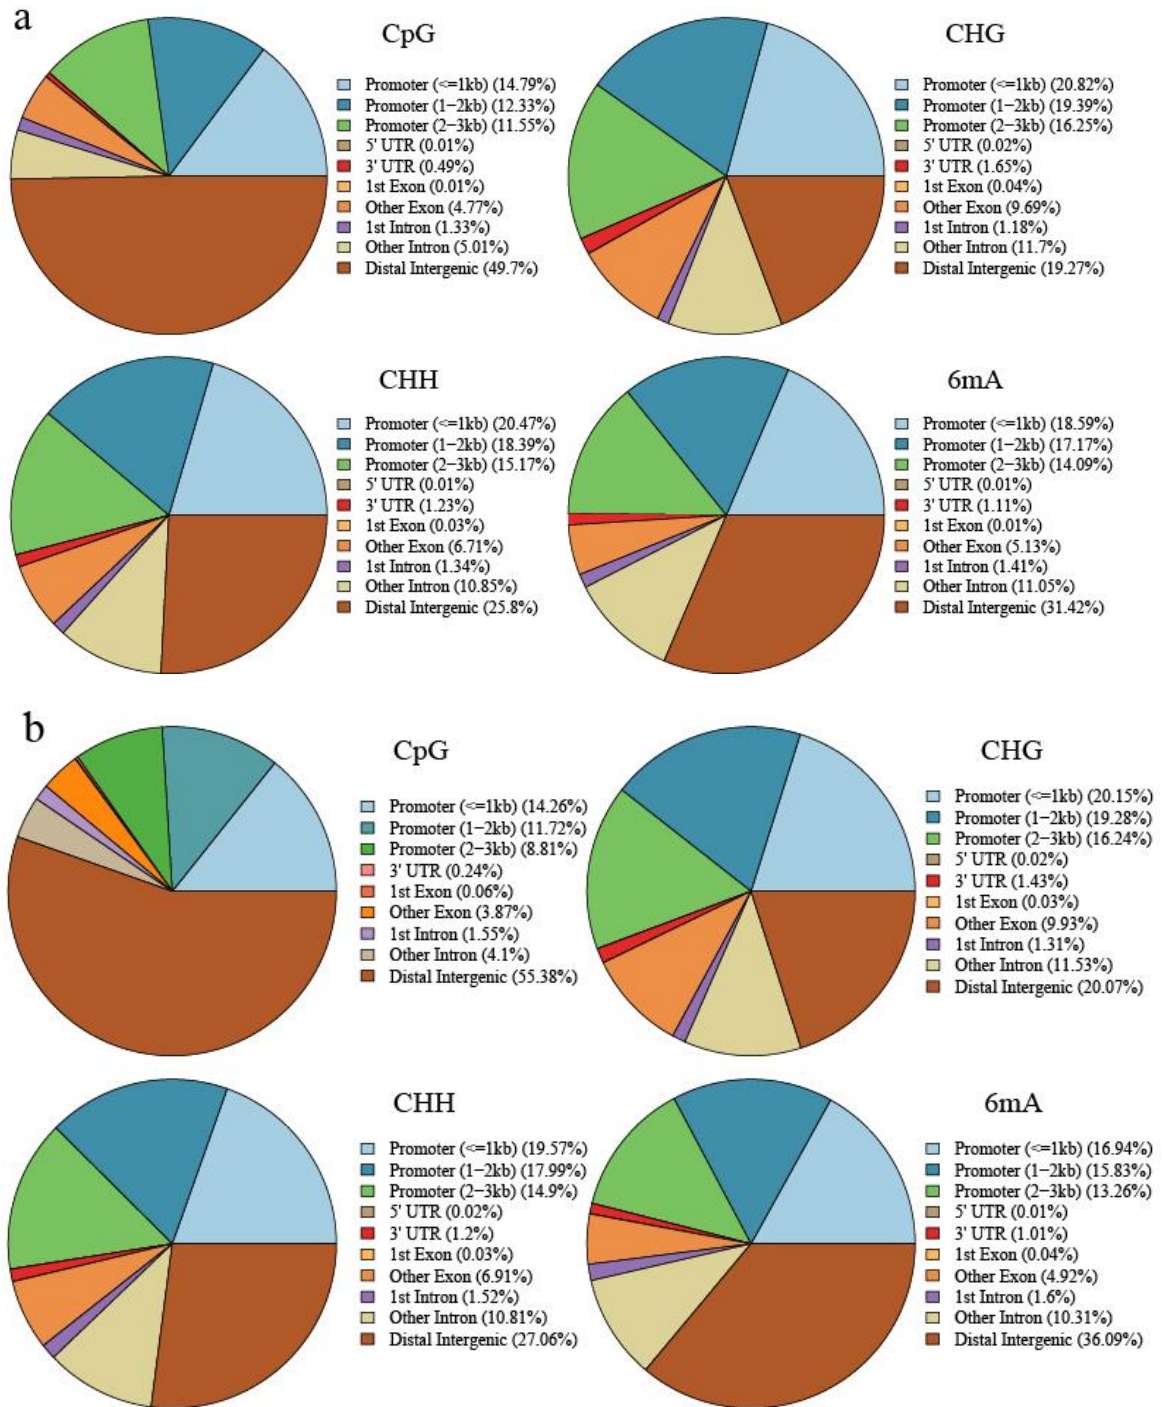

**Figure S3 (A).** DML gene region annotation classification. a: JZ\_vs\_JD; b: SZ\_vs\_SD.

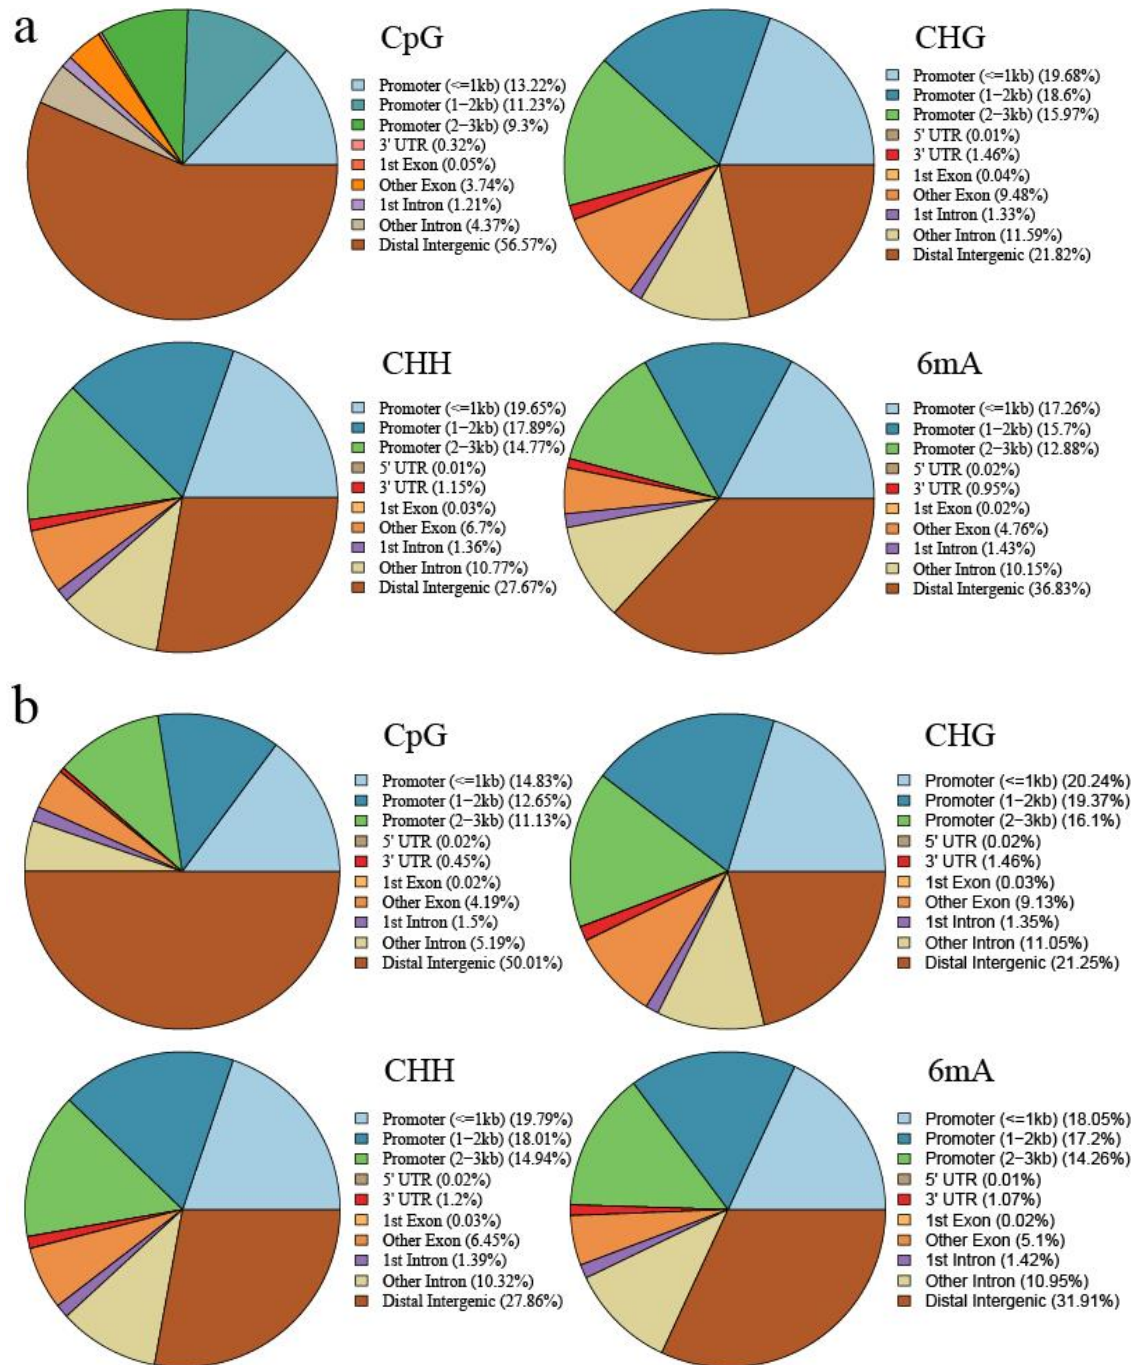

**Figure S3 (B).** DML gene region annotation classification. a: JD\_vs\_SD; b: JZ\_vs\_SZ.



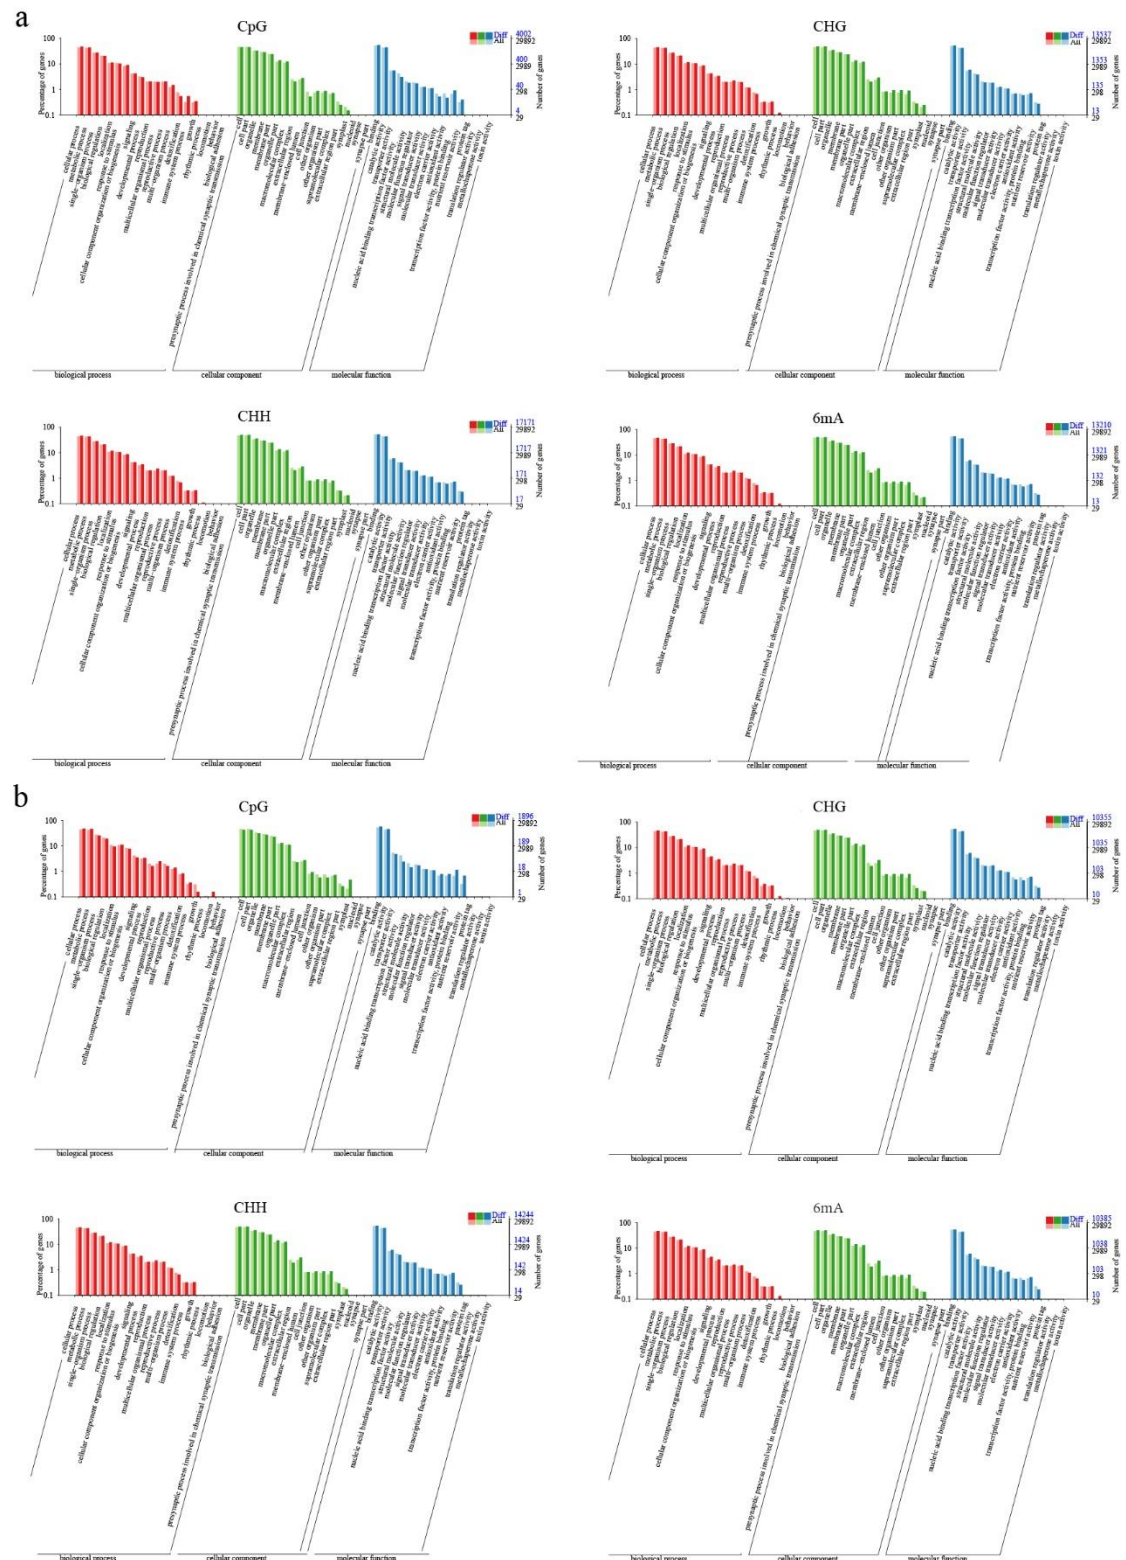

**Figure S4.** GO enrichment map of DMR-associated genes. a: JZ\_vs\_JD; b: SZ\_vs\_SD.

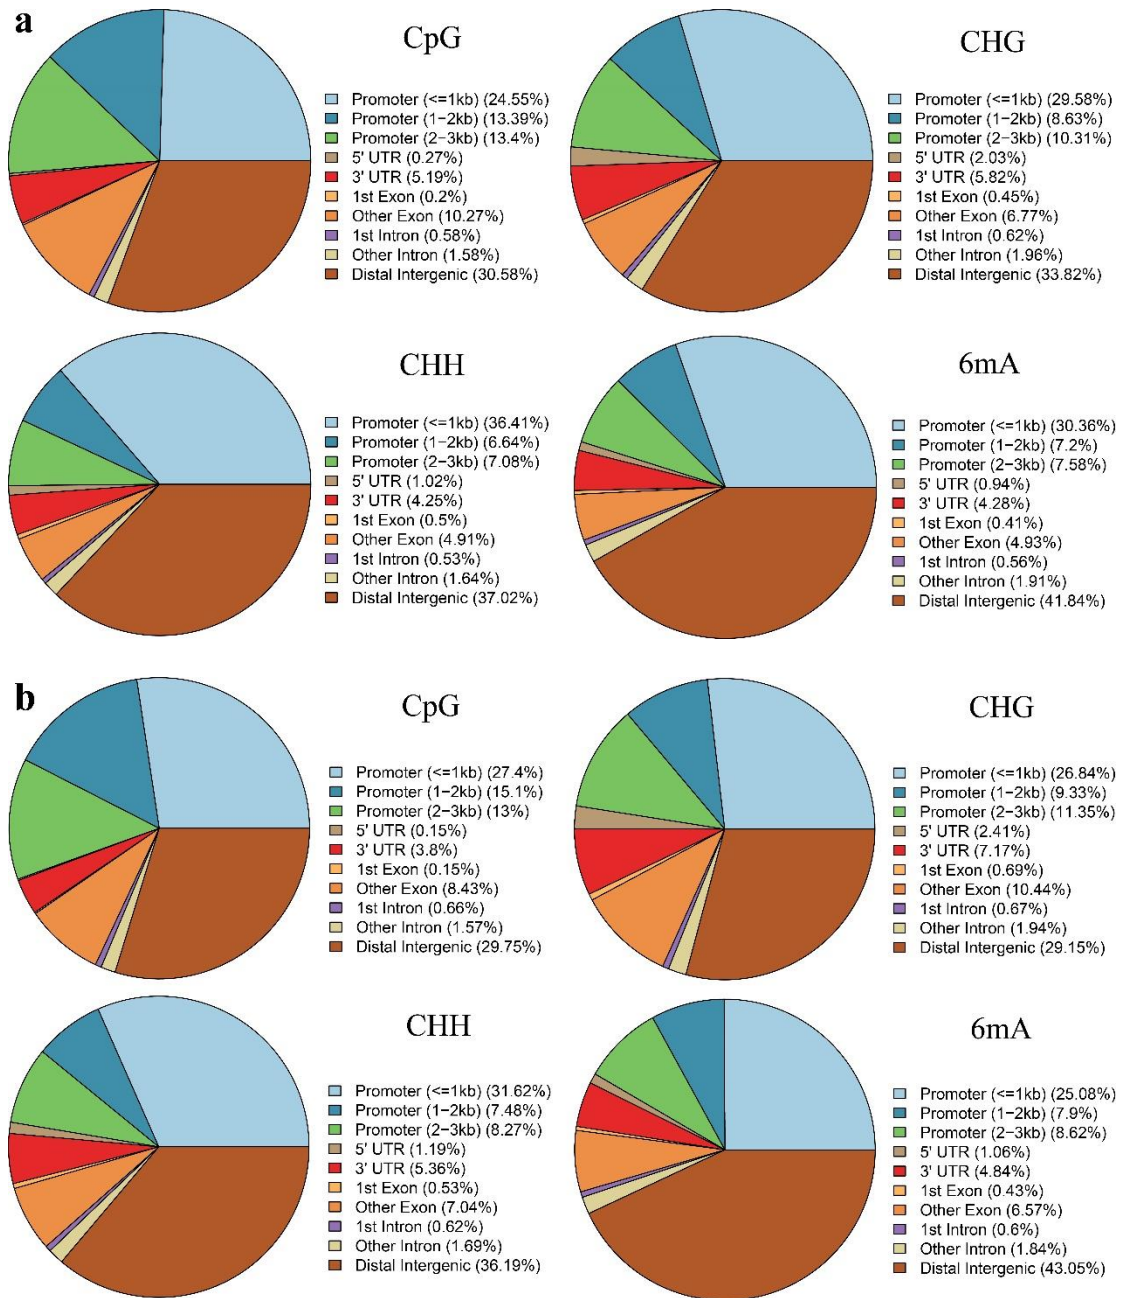

**Figure S5 (A).** DMR gene region annotation classification. a: JZ\_vs\_JD; b: SZ\_vs\_SD.

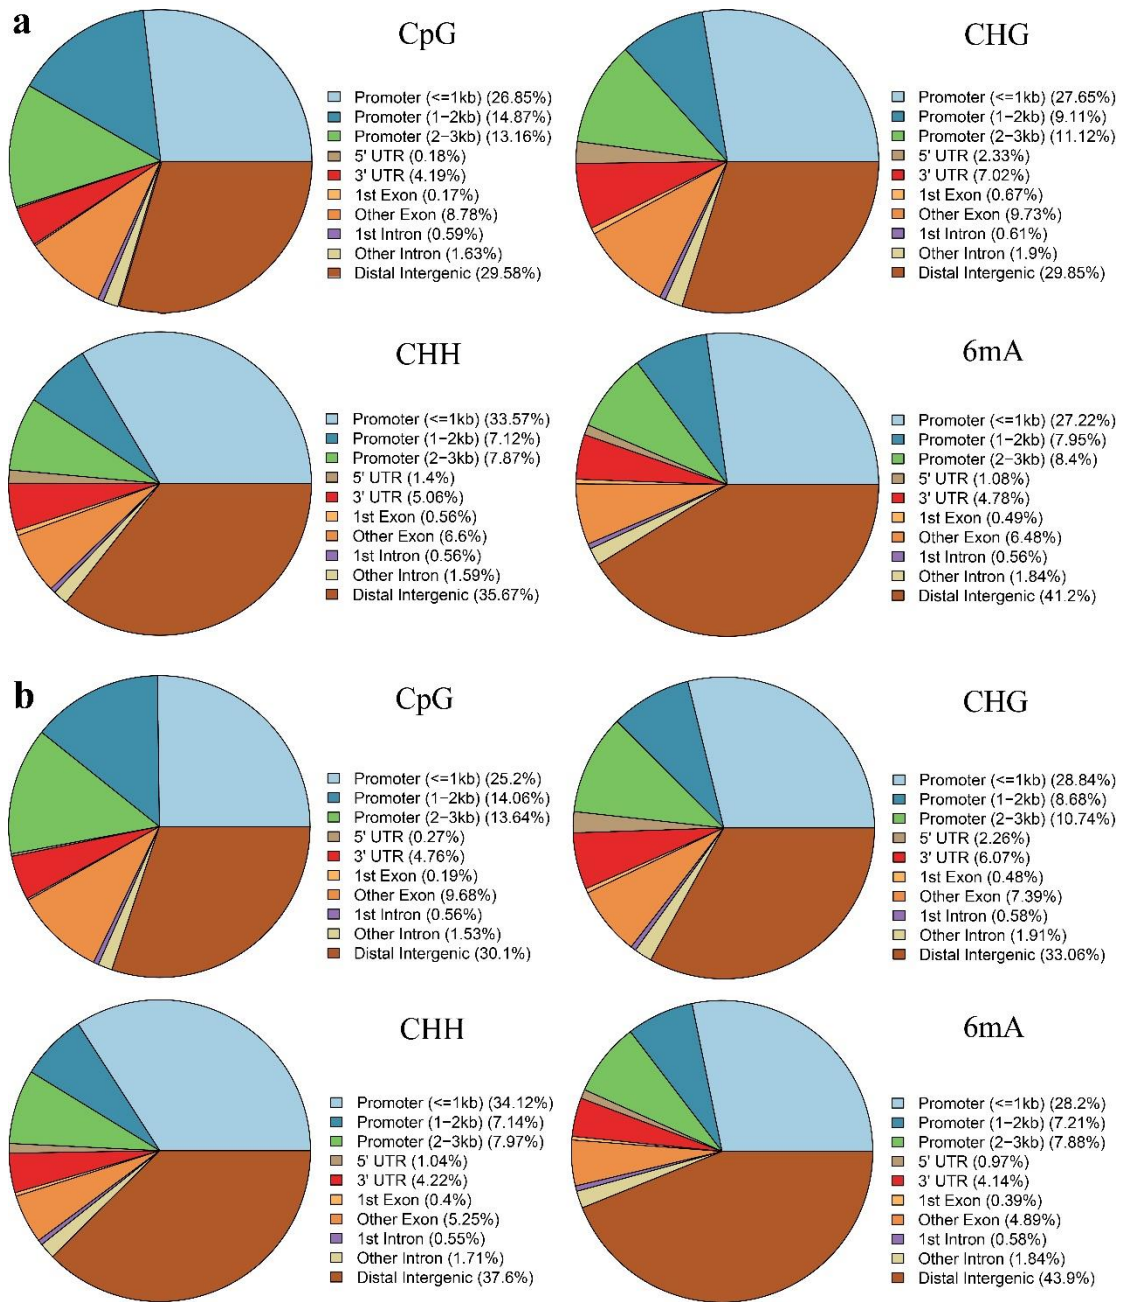

**Figure S5 (B).** DMR gene region annotation classification. a: JD\_vs\_SD; b: JZ\_vs\_SZ.
